# Supplementary material for: Genetic Interactions of Histone Modification Machinery Set1 and PAF1C with the Recombination Complex Rec114-Mer2-Mei4 in the Formation of Meiotic DNA Double-Strand Breaks
Source: MDPI journal article supplement (doi:10.3390/ijms21082679), 2020-04-12
Supplement: s1 [file s1]

**Table S1. Strain List**

|            |                                                                                                                                                                                                                              |
|------------|------------------------------------------------------------------------------------------------------------------------------------------------------------------------------------------------------------------------------|
| MSY831/833 | <i>MATa</i> $\alpha$ , <i>ho::LYS2</i> <sup>+</sup> , <i>lys2</i> <sup>+</sup> , <i>ura3</i> <sup>+</sup> , <i>leu2::hisG</i> <sup>+</sup> , <i>trp1::hisG</i> <sup>+</sup>                                                  |
| NKY1551    | <i>MATa</i> $\alpha$ , <i>ho::LYS2</i> <sup>+</sup> , <i>lys2</i> <sup>+</sup> , <i>ura3</i> <sup>+</sup> , <i>leu2::hisG</i> <sup>+</sup> ,<br><i>his4X-LEU2(BamHI)-URA3/his4B-LEU2(MluI)</i> ,<br><i>arg4-bgl/arg4-nsp</i> |
| ZYY389     | MSY831/833 with <i>rtf1::TRP1</i> <sup>+</sup>                                                                                                                                                                               |
| ZYY391     | MSY831/833 with <i>rtf1::TRP1</i> <sup>+</sup> , <i>REC114-myc::KamMX6</i> <sup>+</sup>                                                                                                                                      |
| ZYY411     | MSY831/833 with <i>REC114-myc::KamMX6</i> <sup>+</sup>                                                                                                                                                                       |
| ZYY733     | MSY831/833 with <i>set1::URA3</i> <sup>+</sup>                                                                                                                                                                               |
| ZYY812     | MSY831/833 with <i>set1::URA3</i> <sup>+</sup> , <i>REC114-myc::KamMX6</i> <sup>+</sup>                                                                                                                                      |
| ZYY874     | MSY831/833 with <i>rtf1::TRP1</i> <sup>+</sup> , <i>MER2-myc::KamMX6</i> <sup>+</sup>                                                                                                                                        |
| ZYY893     | MSY831/833 with <i>MER2-myc::KamMX6</i> <sup>+</sup>                                                                                                                                                                         |
| ZYY811     | MSY831/833 with <i>cdc73::TRP1</i> <sup>+</sup>                                                                                                                                                                              |
| ZYY736     | MSY831/833 with <i>cdc73::TRP1</i> <sup>+</sup> , <i>REC114-myc::KamMX6</i> <sup>+</sup>                                                                                                                                     |
| ZYY892     | MSY831/833 with <i>spp1::HYGMX6</i> <sup>+</sup>                                                                                                                                                                             |
| ZYY1030    | MSY831/833 with <i>spp1::HYGMX6</i> <sup>+</sup> , <i>MER2-myc::KamMX6</i> <sup>+</sup>                                                                                                                                      |
| ZYY1031    | MSY831/833 with <i>rtf1::TRP1</i> <sup>+</sup>                                                                                                                                                                               |
| ZYY1032    | MSY831/833 with <i>rtf1::TRP1</i> <sup>+</sup> , <i>SPO11-FLAG::KamMX6</i>                                                                                                                                                   |
| SGY854/855 | NKY1551 with <i>dmc1::URA3</i> <sup>+</sup>                                                                                                                                                                                  |
| SGY859/860 | NKY1551 with <i>rtf1::TRP1</i> <sup>+</sup> , <i>dmc1::URA3</i> <sup>+</sup>                                                                                                                                                 |
| ZYY1016    | NKY1551 with <i>REC114-myc::KamMX6</i> <sup>+</sup> <i>dmc1::URA3</i> <sup>+</sup>                                                                                                                                           |
| ZYY1029    | NKY1551 with <i>REC114-myc::KamMX6</i> <sup>+</sup> , <i>rtf1::TRP1</i> <sup>+</sup> ,<br><i>dmc1::URA3</i> <sup>+</sup>                                                                                                     |

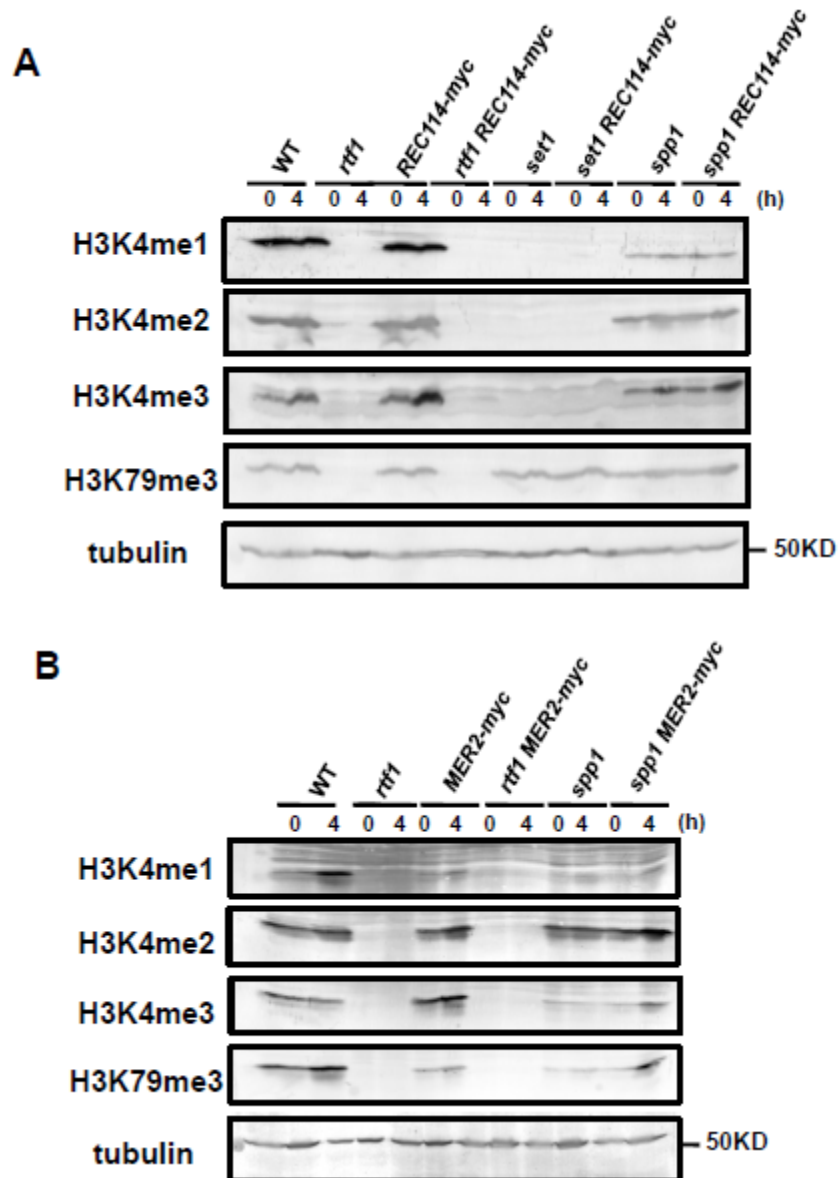

**Figure S1.** Western blotting analysis of histone modifications in various strains during meiosis. Cell lysates obtained from wild type and various mutant cells in meiosis at 0 and 4 h in meiosis were analyzed by Western blotting using anti-histone H3K4 mono-, di- and tri-methylation as well as anti-histone H3K79 tri-methylation. Tubulin was used as a control. The *rtf1* mutant almost abolished H3K4 mono-, di- and tri-methylation and anti-histone H3K79 tri-methylation. The *set1* mutant is defective in H3K4 mono-, di- and tri-methylation, but not in H3K79 tri-methylation. The *spp1* mutant shows reduced level of H3K4 methylations. The myc-tag on either the *REC114* (A) or *MER2* (B) did not affect the status of H3K4 and K79 methylations in various mutants. Wild type, MSY831/833; *rtf1*, ZYY839; *REC114-myc*, ZYY411; *rtf1 REC114-myc*, ZYY391; *spp1*, ZYY892; *spp1 REC114-myc*, ZYY739; *set1*, ZYY733; *set1 REC114-myc*, ZYY1812; *MER2-myc*, ZYY893; *rtf1 MER2-myc*, ZYY874; *spp1 MER2-myc*, ZYY1030.

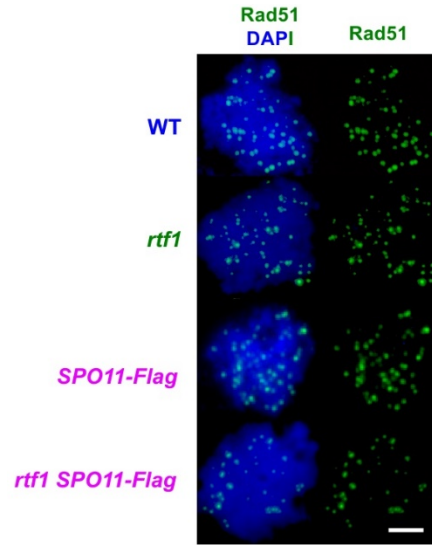

**Figure S2.** Rad51 staining in the *SPO11-Flag* strains. Nuclear spreads from cells undergoing meiosis at various strains were stained with anti-Rad51 (green) and DAPI (blue). The representative images of Rad51-staining from each strain are shown. Wild type, MSY831/833; *rtf1*, ZYY839; *SPO11-Flag*, ZYY1031; *rtf1 SPO11-Flag*, ZYY1032. Bar = 2  $\mu$ m.

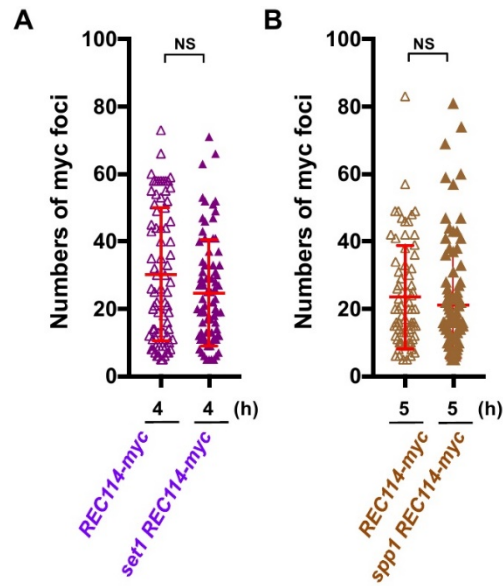

**Figure S3.** Numbers of Rec114-myc foci in various strains. Distribution of Rec114-myc-focus number is shown. The number of myc foci in focus-positive nuclei (with more than 5 foci) is shown. At each time point, 42 spreads from three independent time courses ( $n=126$ ;  $42 \times 3$ ) were examined. *REC114-myc*, ZYY411; *set1 REC114-myc*, ZYY1812; *spp1 REC114-myc*, ZYY739.

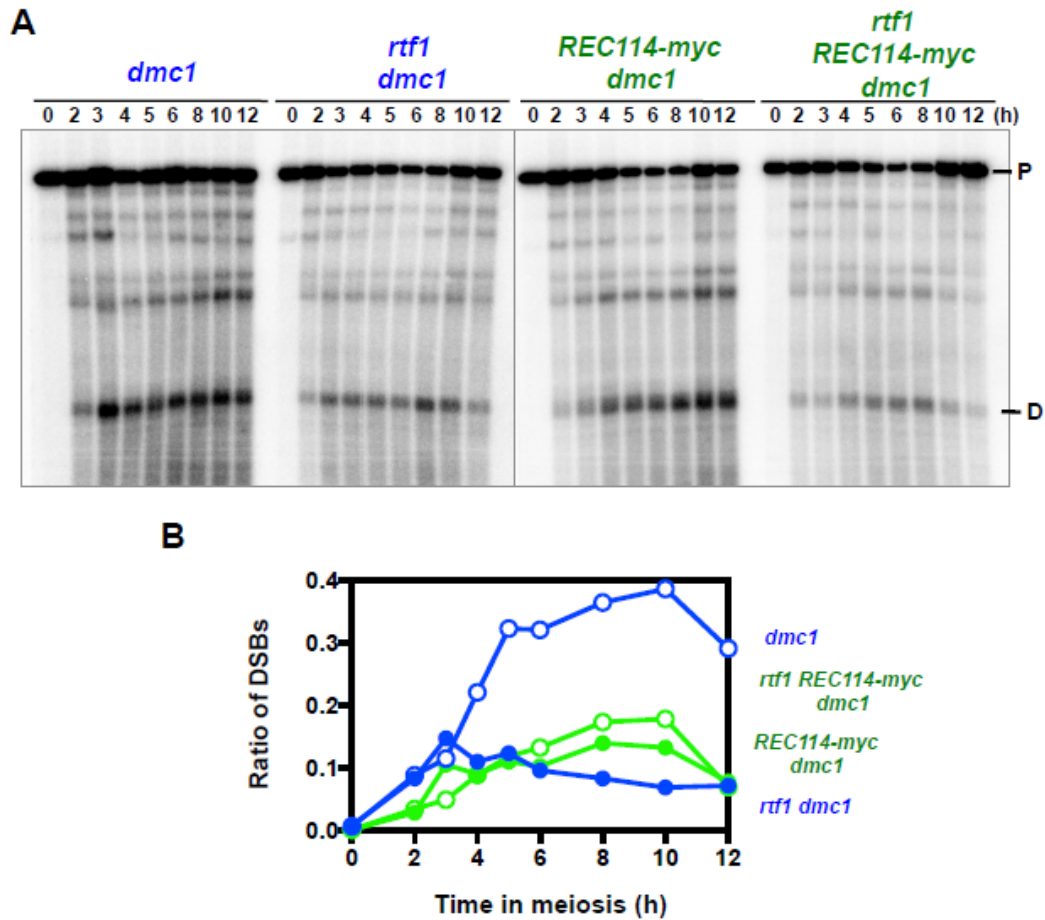

**Figure S4.** DSB formation at the *HIS4-LEU2* locus in various *dmc1* strains. DSB repair at the *HIS4-LEU2* locus were analyzed by Southern blotting (A). Genomic DNAs were prepared and digested with *Pst*I. On each blot, ratio of DSB bands at site I of the locus ("D", in the right) to parental bands (P) was calculated and plotted (B). *dmc1*Δ (SGY854/855), *rtf1*Δ *dmc1*Δ (SGY859/860), *REC114-myc* *dmc1*Δ (ZYY1016) and *rtf1*Δ *REC114-myc* *dmc1*Δ (ZYY1029) cells were used. In the *dmc1*Δ, DSB fragments appeared at 2 h and accumulated during further incubation. The *rtf1*Δ *dmc1*Δ, *REC114-myc* *dmc1*Δ and *rtf1*Δ *REC114-myc* *dmc1*Δ mutants showed ~3-fold reduced DSBs compared to the *dmc1*Δ mutant.

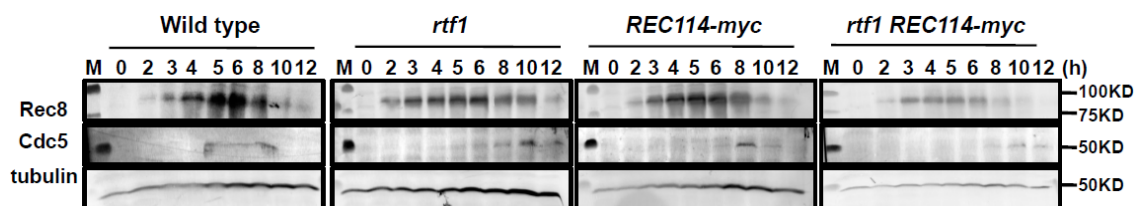

**Figure S5.** Western blotting analysis of meiosis progression in various strains. Cell lysates obtained from wild type (MSY831/833) and various mutant cells in meiosis at indicated times in meiosis were analyzed by western blotting using anti-Rec8 (top), and anti-Cdc5 antibodies (middle). Tubulin was used as a control (bottom). "M" shows a marker. Wild type, MSHY831/833; *rtf1*Δ, ZYY839; *REC114-myc*Δ, ZYY411; *rtf1*Δ *REC114-myc*Δ. Rec8 is induced at 2 h after the induction of meiosis and disappears at late time points. Cdc5 is transiently expressed after pachytene stage during meiosis. The *rtf1*Δ, *REC114-myc*Δ, and *rtf1*Δ *REC114-myc*Δ cells delay the expression of Cdc5 compared to wild-type cells.
