# Supplementary material for: Genetic Interactions of Histone Modification Machinery Set1 and PAF1C with the Recombination Complex Rec114-Mer2-Mei4 in the Formation of Meiotic DNA Double-Strand Breaks
Source: Int J Mol Sci. 2020 Apr 12;21(8):2679. doi: 10.3390/ijms21082679 (PMC7215556; doi:10.3390/ijms21082679)
Supplement: Supplementary file 1 [file ijms-21-02679-s001.zip › Supplemental Table.S2.xlsx]

## Sheet: Figure 2B
			Methods	P-values				Methods	P-values				Methods	P-values				Methods	P-values				Methods	P-values
Fig. 2B-i	WT 4 h	WT 5 h	Wilcoxon	>0.99999	Fig. 2B-ii	WT 4 h	WT 5 h	Wilcoxon	>0.99999	Fig. 2B-iii	WT 4 h	WT 5 h	Wilcoxon	0.625	Fig. 2B-iv	WT 4 h	WT 5 h	Wilcoxon	>0.9999	Fig. 2B-v	WT 4 h	WT 5 h	Wilcoxon	0.625
	WT 4 h	WT 6 h	Wilcoxon	>0.99999		WT 4 h	WT 6 h	Wilcoxon	>0.99999		WT 4 h	WT 6 h	Wilcoxon	0.875		WT 4 h	WT 6 h	Wilcoxon	0.7302		WT 4 h	WT 6 h	Wilcoxon	>0.9999
	rtf1 4 h	rtf1 5 h	Wilcoxon	0.625		cdc73 4 h	cdc73 5 h	Wilcoxon	0.625		set1 4 h	set1 5 h	Wilcoxon	>0.9999		spp1 4 h	spp1 5 h	Wilcoxon	0.625		rtf1 4 h	rtf1 5 h	Wilcoxon	>0.9999
	rtf1 4 h	rtf1 6 h	Wilcoxon	>0.99999		cdc73 4 h	cdc73 6 h	Wilcoxon	0.8125		set1 4 h	set1 6 h	Wilcoxon	0.5625		spp1 4 h	spp1 6 h	Wilcoxon	0.875		rtf1 4 h	rtf1 6 h	Wilcoxon	>0.9999
	REC114-myc 4 h	REC114-myc 5 h	Wilcoxon	>0.99999		REC114-myc 4 h	REC114-myc 5 h	Wilcoxon	0.875		REC114-myc 4 h	REC114-myc 5 h	Wilcoxon	0.875		REC114-myc 4 h	REC114-myc 5 h	Wilcoxon	>0.9999		MER2-myc 4 h	MER2-myc 5 h	Wilcoxon	>0.9999
	REC114-myc 4 h	REC114-myc 6 h	Wilcoxon	>0.99999		REC114-myc 4 h	REC114-myc 6 h	Wilcoxon	0.875		REC114-myc 4 h	REC114-myc 6 h	Wilcoxon	0.625		REC114-myc 4 h	REC114-myc 6 h	Wilcoxon	0.875		MER2-myc 4 h	MER2-myc 6 h	Wilcoxon	>0.9999
	rtf1 REC114-myc 4 h	rtf1 REC114-myc 5 h	Wilcoxon	>0.99999		cdc73 REC114-myc 4 h	cdc73 REC114-myc 5 h	Wilcoxon	>0.99999		set1 REC114-myc 4 h	set1 REC114-myc 5 h	Wilcoxon	>0.9999		spp1 REC114-myc 4 h	spp1 REC114-myc 5 h	Wilcoxon	0.875		rtf1 MER2-myc 4 h	rtf1 MER2-myc 5 h	Wilcoxon	>0.9999
	rtf1 REC114-myc 4 h	rtf1 REC114-myc 6 h	Wilcoxon	>0.99999		cdc73 REC114-myc 4 h	cdc73 REC114-myc 6 h	Wilcoxon	>0.99999		set1 REC114-myc 4 h	set1 REC114-myc 6 h	Wilcoxon	>0.9999		spp1 REC114-myc 4 h	spp1 REC114-myc 6 h	Wilcoxon	0.875		rtf1 MER2-myc 4 h	rtf1 MER2-myc 6 h	Wilcoxon	>0.9999
	WT 4 h	rtf1 4 h	Mann Whitney	>0.99999		WT 4 h	cdc73 4 h	Mann Whitney	0.8016		WT 4 h	set1 4 h	Mann Whitney	0.3095		WT 4 h	spp1 4 h	Mann Whitney	0.6905		WT 4 h	rtf1 4 h	Mann Whitney	0.8968
	WT 5 h	rtf1 5 h	Mann Whitney	>0.99999		WT 5 h	cdc73 5 h	Mann Whitney	0.9524		WT 5 h	set1 5 h	Mann Whitney	0.6905		WT 5 h	spp1 5 h	Mann Whitney	0.4603		WT 5 h	rtf1 5 h	Mann Whitney	>0.9999
	WT 6 h	rtf1 6 h	Mann Whitney	>0.99999		WT 6 h	cdc73 6 h	Mann Whitney	>0.9999		WT 6 h	set1 6 h	Mann Whitney	>0.9999		WT 6 h	spp1 6 h	Mann Whitney	>0.9999		WT 6 h	rtf1 6 h	Mann Whitney	>0.9999
	WT 4 h	REC114-myc 4 h	Mann Whitney	0.4524		WT 4 h	REC114-myc 4 h	Mann Whitney	>0.99999		WT 4 h	REC114-myc 4 h	Mann Whitney	0.381		WT 4 h	REC114-myc 4 h	Mann Whitney	0.5317		WT 4 h	MER2-myc 4 h	Mann Whitney	0.5397
	WT 5 h	REC114-myc 5 h	Mann Whitney	0.8413		WT 5 h	REC114-myc 5 h	Mann Whitney	0.9683		WT 5 h	REC114-myc 5 h	Mann Whitney	0.7302		WT 5 h	REC114-myc 5 h	Mann Whitney	0.7302		WT 5 h	MER2-myc 5 h	Mann Whitney	0.7857
	WT 6 h	REC114-myc 6 h	Mann Whitney	0.6905		WT 6 h	REC114-myc 6 h	Mann Whitney	0.8968		WT 6 h	REC114-myc 6 h	Mann Whitney	0.8413		WT 6 h	REC114-myc 6 h	Mann Whitney	0.8889		WT 6 h	MER2-myc 6 h	Mann Whitney	0.8333
	WT 4 h	rtf1 REC114-myc 4 h	Mann Whitney	0.1111		WT 4 h	cdc73 REC114-myc 4 h	Mann Whitney	0.3016		WT 4 h	set1 REC114-myc 4 h	Mann Whitney	0.1111		WT 4 h	spp1 REC114-myc 4 h	Mann Whitney	0.5476		WT 4 h	rtf1 MER2-myc 4 h	Mann Whitney	0.8333
	WT 5 h	rtf1 REC114-myc 5 h	Mann Whitney	0.127		WT 5 h	cdc73 REC114-myc 5 h	Mann Whitney	0.3333		WT 5 h	set1 REC114-myc 5 h	Mann Whitney	0.1429		WT 5 h	spp1 REC114-myc 5 h	Mann Whitney	0.2857		WT 5 h	rtf1 MER2-myc 5 h	Mann Whitney	0.3016
	WT 6 h	rtf1 REC114-myc 6 h	Mann Whitney	0.2857		WT 6 h	cdc73 REC114-myc 6 h	Mann Whitney	0.5397		WT 6 h	set1 REC114-myc 6 h	Mann Whitney	0.246		WT 6 h	spp1 REC114-myc 6 h	Mann Whitney	0.7302		WT 6 h	rtf1 MER2-myc 6 h	Mann Whitney	0.6905
	rtf1 4 h	REC114-myc 4 h	Mann Whitney	0.8968		cdc73 4 h	REC114-myc 4 h	Mann Whitney	0.6905		set1 4 h	REC114-myc 4 h	Mann Whitney	0.9048		spp1 4 h	REC114-myc 4 h	Mann Whitney	0.8968		rtf1 4 h	REC114-myc 4 h	Mann Whitney	0.4365
	rtf1 5 h	REC114-myc 5 h	Mann Whitney	0.5476		cdc73 5 h	REC114-myc 5 h	Mann Whitney	0.6587		set1 5 h	REC114-myc 5 h	Mann Whitney	>0.9999		spp1 5 h	REC114-myc 5 h	Mann Whitney	0.9365		rtf1 5 h	REC114-myc 5 h	Mann Whitney	0.881
	rtf1 6 h	REC114-myc 6 h	Mann Whitney	0.8889		cdc73 6 h	REC114-myc 6 h	Mann Whitney	>0.9999		set1 6 h	REC114-myc 6 h	Mann Whitney	0.7302		spp1 6 h	REC114-myc 6 h	Mann Whitney	>0.9999		rtf1 6 h	REC114-myc 6 h	Mann Whitney	0.8095
	rtf1 4 h	rtf1 REC114-myc 4 h	Mann Whitney	0.1111		cdc73 4 h	cdc73 REC114-myc 4 h	Mann Whitney	0.3016		set1 4 h	set1 REC114-myc 4 h	Mann Whitney	0.2857		spp1 4 h	spp1 REC114-myc 4 h	Mann Whitney	>0.9999		rtf1 4 h	rtf1 MER2-myc 4 h	Mann Whitney	0.8333
	rtf1 5 h	rtf1 REC114-myc 5 h	Mann Whitney	0.127		cdc73 5 h	cdc73 REC114-myc 5 h	Mann Whitney	0.2778		set1 5 h	set1 REC114-myc 5 h	Mann Whitney	0.4444		spp1 5 h	spp1 REC114-myc 5 h	Mann Whitney	0.5079		rtf1 5 h	rtf1 MER2-myc 5 h	Mann Whitney	0.4444
	rtf1 6 h	rtf1 REC114-myc 6 h	Mann Whitney	0.2857		cdc73 6 h	cdc73 REC114-myc 6 h	Mann Whitney	0.5635		set1 6 h	set1 REC114-myc 6 h	Mann Whitney	0.3016		spp1 6 h	spp1 REC114-myc 6 h	Mann Whitney	0.6905		rtf1 6 h	rtf1 MER2-myc 6 h	Mann Whitney	0.5635
	REC114-myc 4 h	rtf1 REC114-myc 4 h	Mann Whitney	0.2857		REC114-myc 4 h	cdc73 REC114-myc 4 h	Mann Whitney	0.5556		REC114-myc 4 h	set1 REC114-myc 4 h	Mann Whitney	0.5238		REC114-myc 4 h	spp1 REC114-myc 4 h	Mann Whitney	0.9841		REC114-myc 4 h	rtf1 MER2-myc 4 h	Mann Whitney	>0.9999
	REC114-myc 5 h	rtf1 REC114-myc 5 h	Mann Whitney	0.5635		REC114-myc 5 h	cdc73 REC114-myc 5 h	Mann Whitney	0.2063		REC114-myc 5 h	set1 REC114-myc 5 h	Mann Whitney	0.4444		REC114-myc 5 h	spp1 REC114-myc 5 h	Mann Whitney	0.8254		REC114-myc 5 h	rtf1 MER2-myc 5 h	Mann Whitney	0.6825
	REC114-myc 6 h	rtf1 REC114-myc 6 h	Mann Whitney	0.6905		REC114-myc 6 h	cdc73 REC114-myc 6 h	Mann Whitney	0.5397		REC114-myc 6 h	set1 REC114-myc 6 h	Mann Whitney	0.3016		REC114-myc 6 h	spp1 REC114-myc 6 h	Mann Whitney	0.746		REC114-myc 6 h	rtf1 MER2-myc 6 h	Mann Whitney	>0.9999

## Sheet: Figure 3
Figure 3A							Figure 3B							Figure 3C							Figure 3D
	Strain A	n (strain A)	Strain B	n (strain B)	Methods	P-values		Strain A	n (strain A)	Strain B	n (strain B)	Methods	P-values		Strain A	n (strain A)	Strain B	n (strain B)	Methods	P-values		Strain A	n (strain A)	Strain B	n (strain B)	Methods	P-values
	WT 4h	45	REC114-myc 4 h	49	Mann Whitney	<0.0001		WT 4h	51	MER2-myc 4 h	45	Mann Whitney	0.0038		REC114-myc 4h	126	REC114-myc 5h	126	Wilcoxon	<0.0001		MER2-myc 4h	65	MER2-myc 5h	88	Wilcoxon	<0.0001
	WT 4h	45	rtf1 4h	47	Mann Whitney	0.0006		WT 4h	51	rtf1 4h	45	Mann Whitney	0.5745		REC114-myc 4h	126	REC114-myc 6h	126	Wilcoxon	<0.0001		MER2-myc 4h	65	MER2-myc 6h	77	Wilcoxon	0.0029
	WT 4h	45	rtf1 REC114-myc 4h	8	Mann Whitney	0.0007		WT 4h	51	rtf1 MER2-myc 4h	28	Mann Whitney	<0.0001
	WT 4h	45	cdc73 4h	72	Mann Whitney	<0.0001		WT 4h	51	spp1	51	Mann Whitney	0.5165		rtf1 REC114-myc 4h	126	rtf1 REC114-myc 5h	126	Wilcoxon	<0.0001		rtf1 MER2-myc 4h	74	rtf1 MER2-myc 5h	88	Wilcoxon	<0.0001
	WT 4h	45	cdc73 REC114-myc 4h	10	Mann Whitney	<0.0001		WT 4h	51	spp1 MER2-myc 4h	58	Mann Whitney	<0.0001		rtf1 REC114-myc 4h	126	rtf1 REC114-myc 6h	126	Wilcoxon	<0.0001		rtf1 MER2-myc 4h	74	rtf1 MER2-myc 6h	51	Wilcoxon	<0.0001
	WT 4h	45	set1 5h		Mann Whitney	<0.0001		WT 4h	51	SPO11-FLAG 4h	59	Mann Whitney	0.8263
	WT 4h	45	set1 REC114-myc 5h		Mann Whitney	0.0021		WT 4h	51	rtf1 SPO11-FLAG 4h	67	Mann Whitney	0.3533		REC114-myc 4h	126	rtf1 REC114-myc 4h	126	Mann Whitney	0.9621		MER2-myc 4h	65	rtf1 MER2-myc 4h	74	Mann Whitney	0.3838
	WT 4h	45	spp1 6h		Mann Whitney	<0.0001									REC114-myc 5h	126	rtf1 REC114-myc 5h	126	Mann Whitney	0.4268		MER2-myc 5h	88	rtf1 MER2-mycc 5h	88	Mann Whitney	0.7842
	WT 4h	45	spp1 REC114-myc 6h		Mann Whitney	<0.0001		MER2-myc 4 h	45	rtf1 4h	45	Mann Whitney	0.0053		REC114-myc 6h	126	rtf1 REC114-myc 6h	126	Mann Whitney	0.3886		MER2-myc 6h	77	rtf1 MER2-myc 6h	51	Mann Whitney	0.5514
								MER2-myc 4 h	45	rtf1 MER2-myc 4h	28	Mann Whitney	0.0001
	REC114-myc 4 h	49	rtf1 4h	47	Mann Whitney	0.0017		MER2-myc 4 h	45	spp1 4h	51	Mann Whitney	0.0042
	REC114-myc 4 h	49	rtf1 REC114-myc 4h	8	Mann Whitney	0.739		MER2-myc 4 h	45	spp1 MER2-myc 4h	58	Mann Whitney	0.0357
	REC114-myc 4 h	49	cdc73 4h	72	Mann Whitney	0.7832		MER2-myc 4 h	45	SPO11-FLAG 4h	59	Mann Whitney	0.0003
	REC114-myc 4 h	49	cdc73 REC114-myc 4h	10	Mann Whitney	<0.0001		MER2-myc 4 h	45	rtf1 SPO11-FLAG 4h	67	Mann Whitney	0.0275
	REC114-myc 4 h	49	set1 5h	57	Mann Whitney	0.5199
	REC114-myc 4 h	49	set1 REC114-myc 5h	3	Mann Whitney	0.1566		rtf1 4h	45	rtf1 MER2-myc 4h	28	Mann Whitney	<0.0001
	REC114-myc 4 h	49	spp1 6h	54	Mann Whitney	0.0195		rtf1 4h	45	spp1	51	Mann Whitney	0.8335
	REC114-myc 4 h	49	spp1 REC114-myc 6h		Mann Whitney	0.3149		rtf1 4h	45	spp1 MER2-myc 4h	58	Mann Whitney	<0.0001
								rtf1 4h	45	SPO11-FLAG 4h	59	Mann Whitney	0.3762
	rtf1 4h	47	rtf1 REC114-myc 4h	8	Mann Whitney	0.0467		rtf1 4h	45	rtf1 SPO11-FLAG 4h	67	Mann Whitney	0.5998
	rtf1 4h	47	cdc73 4h	72	Mann Whitney	0.0105
	rtf1 4h	47	cdc73 REC114-myc 4h	10	Mann Whitney	<0.0001		spp1 4h	51	spp1 MER2-myc 4h	58	Mann Whitney	<0.0001
	rtf1 4h	47	set1 5h	57	Mann Whitney	0.0063		spp1 4h	51	SPO11-FLAG 4h	59	Mann Whitney	0.225
	rtf1 4h	47	set1 REC114-myc 5h	3	Mann Whitney	0.0172		spp1 4h	51	rtf1 SPO11-FLAG 4h	67	Mann Whitney	0.6007
	rtf1 4h	47	spp1 6h	54	Mann Whitney	0.362
	rtf1 4h	47	spp1 REC114-myc 6h	25	Mann Whitney	0.0695		SPO11-FLAG 4h	59	rtf1 SPO11-FLAG 4h	67	Mann Whitney	0.1645
	cdc73 4h	72	cdc73 REC114-myc 4h	10	Mann Whitney	0.0003
	cdc73 4h	72	set1 5h	57	Mann Whitney	0.8582
	cdc73 4h	72	set1 REC114-myc 5h	3	Mann Whitney	0.1475
	cdc73 4h	72	spp1 6h	54	Mann Whitney	0.0738
	cdc73 4h	72	spp1 REC114-myc 6h	25	Mann Whitney	0.7196
	set1 5h	57	set1 REC114-myc 5h	3	Mann Whitney	0.1488
	set1 5h	57	spp1 6h	54	Mann Whitney	0.0651
	set1 5h	57	spp1 REC114-myc 6h	25	Mann Whitney	0.683
	spp1 6h	54	spp1 REC114-myc6h	25	Mann Whitney	0.2488

## Sheet: Figure 4B
		Methods	P-values
dmc1 4 h	dmc1 5 h	Wilcoxon	>0.9999
dmc1 4 h	dmc1 6 h	Wilcoxon	>0.9999
dmc1 rtf1 4 h	dmc1 rtf1 5 h	Wilcoxon	>0.9999
dmc1 rtf1 4 h	dmc1 rtf1 6 h	Wilcoxon	0.625
dmc1 REC114-myc 4 h	dmc1 REC114-myc 5 h	Wilcoxon	0.75
dmc1 REC114-myc 4 h	dmc1 REC114-myc 6 h	Wilcoxon	0.625
dmc1 rtf1 REC114-myc 4 h	dmc1 rtf1 REC114-myc 5 h	Wilcoxon	ND
dmc1 rtf1 REC114-myc 4 h	dmc1 rtf1 REC114-myc 6 h	Wilcoxon	ND
dmc1 4 h	dmc1 rtf1 4 h	Mann Whitney	0.5476
dmc1 5 h	dmc1 rtf1 5 h	Mann Whitney	0.5397
dmc1 6 h	dmc1 rtf1 6 h	Mann Whitney	>0.9999
dmc1 4 h	dmc1 REC114-myc 4 h	Mann Whitney	0.7302
dmc1 5 h	dmc1 REC114-myc 5 h	Mann Whitney	0.5476
dmc1 6 h	dmc1 REC114-myc 6 h	Mann Whitney	0.9683
dmc1 4 h	dmc1 rtf1 REC114-myc 4 h	Mann Whitney	0.1111
dmc1 5 h	dmc1 rtf1 REC114-myc 5 h	Mann Whitney	0.1111
dmc1 6 h	dmc1 rtf1 REC114-myc 6 h	Mann Whitney	0.1111
dmc1 rtf1 4 h	dmc1 REC114-myc 4 h	Mann Whitney	>0.9999
dmc1 rtf1 5 h	dmc1 REC114-myc 5 h	Mann Whitney	0.8413
dmc1 rtf1 6 h	dmc1 REC114-myc 6 h	Mann Whitney	0.9683
dmc1 rtf1 4 h	dmc1 rtf1 REC114-myc 4 h	Mann Whitney	0.1111
dmc1 rtf1 5 h	dmc1 rtf1 REC114-myc 5 h	Mann Whitney	0.1111
dmc1 rtf1 6 h	rtf1 REC114-myc 6 h	Mann Whitney	0.1111
dmc1 REC114-myc 4 h	dmc1 rtf1 REC114-myc 4 h	Mann Whitney	0.1111
dmc1 REC114-myc 5 h	dmc1 rtf1 REC114-myc 5 h	Mann Whitney	0.1111
dmc1 REC114-myc 6 h	dmc1 rtf1 REC114-myc 6 h	Mann Whitney	0.1429

## Sheet: Figure 4C
Strain A	n (strain A)	Strain B	n (strain B)	Methods	P-values
dmc1 4 h	106	dmc1 REC114-myc 4 h	71	Mann Whitney	0.0024
dmc1 4 h	106	dmc1 rtf1 4 h	68	Mann Whitney	0.0165
dmc1 4 h	106	dmc1 rtf1 REC114-myc 4 h	0	Mann Whitney	NA
dmc1 REC114-myc 4 h	71	dmc1 rtf1 4 h	68	Mann Whitney	0.9757
dmc1 REC114-myc 4 h	71	dmc1 rtf1 REC114-myc 4 h	0	Mann Whitney	NA
dmc1 rtf1 4 h	68	dmc1 rtf1 REC114-myc 4 h	0	Mann Whitney	NA

## Sheet: Figure S4
Figure S4
			Methods	P-values
	REC114-myc 4 h	set1 REC114-myc 4h	Mann Whitney	0.1406
	REC114-myc 5 h	spp1 REC114-myc 5h	Mann Whitney	0.1804

## Sheet: Sheet1
Time (h)	dmc1-1	dmc1-2	dmc1-3		rtf1 REC114-myc dmc1-1	rtf1 REC114-mycdmc1-2	rtf1 REC114-mycdmc1-3		P valuse (Student t test)
6	3	2	2		31	25	19		0.0029
8	3	10	5		81	81	80.5556		<0.0001
10	6	14	12		89	94.0594	87.5		<0.0001
12	10	12	21		97	100	97.0297		<0.0001
Time (h)	rtf1 dmc1-1	rtf1 dmc1-2	rtf1dmc1-3		rtf1 REC114-myc dmc1-1	rtf1 REC114-mycdmc1-2	rtf1 REC114-mycdmc1-3		P valuse (Student t test)
6	21	8	3		31	25	19		0.0882
8	12.1212	7	6		81	81	80.5556		<0.0001
10	27.4336	6	3		89	94.0594	87.5		<0.0001
12	12.6214	14.8515	11		97	100	97.0297		<0.0001
Time (h)	REC114-myc dmc1-1	REC114-myc dmc1-2	REC114-myc dmc1-3		rtf1 REC114-myc dmc1-1	rtf1 REC114-mycdmc1-2	rtf1 REC114-mycdmc1-3		P valuse (Student t test)
6	1	12	13		31	25	19		0.0343
8	10	5	20.7921		81	81	80.5556		0.0001
10	14	17	16.8317		89	94.0594	87.5		<0.0001
12	16	12	25		97	100	97.0297		<0.0001
